1 Food insecurity is associated with poor hypertension management in the Eastern Caribbean

2

3 Carol R. Oladele<sup>1¶</sup>, Neha Khandpur<sup>2¶&</sup>, Deron Galusha<sup>1</sup>, Sanya Nair<sup>1&</sup>, Saria Hassan<sup>1,3¶&</sup>, Josefa

4 Martinez-Brockman<sup>1¶&</sup>, Marcella Nunez-Smith<sup>1&</sup>, Rafael Perez-Escamilla<sup>4¶</sup>

5

6 <sup>1</sup>Equity Research and Innovation Center, Yale School of Medicine, New Haven, CT, USA

7 <sup>2</sup>Wageningen University and Research, Wageningen, The Netherlands

8 <sup>3</sup>Emory University School of Medicine, Emory Rollins School of Public Health, Atlanta, GA,

9 USA

10 <sup>4</sup>Department of Social and Behavioral Sciences, Yale School of Public Health, New Haven, CT,

11 USA

12

13 **Corresponding author:**

14 E-mail: [carol.oladele@yale.edu](mailto:carol.oladele@yale.edu) (CO)

15

16

17 <sup>¶</sup>These authors contributed equally to this work.

18 <sup>&</sup>These authors also contributed equally to this work.

19 **ABSTRACT**

20 **Background**

21 Limited evidence exists on the association between food insecurity (FI) and blood pressure  
22 control in the Caribbean despite the high burden of both. The objective of this study is to  
23 examine the relationship between FI and hypertension prevalence, awareness, and control in the  
24 Eastern Caribbean.

25 **Methods and Findings**

26 We conducted a cross-sectional analysis of baseline data (2013-2018) from the Eastern  
27 Caribbean Health Outcomes Research Network Cohort Study (n=2961). Food insecurity was  
28 measured using the Latin American and Caribbean Food Security Scale (ELCSA) and classified  
29 as 0=no FI, 1-6 mild/moderate FI, and 7-9 severe FI. Hypertension was defined by the Seventh  
30 Report of the Joint National Committee on Prevention. Logistic regression modeling was  
31 conducted to examine the relationship between FI and hypertension prevalence, awareness, and  
32 control, adjusting for age, sex, educational attainment, site, and usual source of care.

33 Prevalence of FI was 28 percent among participants and was higher in Puerto Rico and Trinidad  
34 and Tobago compared to other sites. Seventeen percent of the participants experienced low, 6  
35 percent moderate, and 4 percent experienced severe FI. Aggregate model results showed no  
36 association between FI and hypertension outcomes. Sex-stratified results showed moderate  
37 (OR=2.65, CI=1.25-5.65) and severe FI (OR=3.69, CI=1.20-11.31) were positively associated  
38 with lack of control among women.

39 Limitations of this study include the cross-sectional design, small sample size, and the average  
40 age of our cohort. Cross-sectional design precluded the ability to make inferences about  
41 temporality between FI and HTN prevalence and awareness. Small sample size precluded the

42 ability to detect statistically significant differences despite strong odds ratios for model results  
43 like lack of control.

44 **Conclusions**

45 Findings align with prior evidence of greater FI prevalence among women and negative health  
46 impact. Nutrition policies are needed to reduce the overall FI burden in the Caribbean and  
47 increase access to affordable, nutritious foods.

## 48 INTRODUCTION

49 Food insecurity (FI), defined by the WHO as an economic or social condition of limited or  
50 uncertain access to adequate food, is an increasing problem worldwide. Estimates from the Food  
51 and Agriculture Organization of the United Nations show that 2.3 billion people (29%)  
52 experienced moderate or severe food insecurity in 2021.<sup>1</sup> Evidence also shows a widening  
53 gender disparity.<sup>1</sup> FI has increased during the last ten years, with much of the increase stemming  
54 from the past three years during the COVID-19 pandemic. An estimated 41 percent of  
55 households experienced food insecurity in 2020, an increase from 32 percent pre-pandemic.<sup>2</sup>  
56 There has also been a 38 percent increase in the number of people who reported going without  
57 food for an entire day between 2021 and 2022.<sup>3</sup> Although it is well known that FI is associated  
58 with adverse health outcomes, including hypertension, a leading cause of morbidity in the  
59 region,<sup>4</sup> there is limited evidence on the health impact of FI in hypertension management in the  
60 Caribbean region despite it being strongly affected by both FI and hypertension.  
61 Several factors contribute to FI in the Caribbean, including a strong reliance on imported food,<sup>5</sup>  
62 poverty,<sup>5</sup> and climate change impacts.<sup>5</sup> Countries in this region import 15 to 95 percent of their  
63 food. The high reliance on imported food poses FI challenges as these foods tend to be  
64 expensive, of limited nutritional value, and oftentimes ultra-processed. Our prior work in the  
65 Eastern Caribbean showed that affordability was a main determinant of fruit and vegetable  
66 consumption, which primarily affected individuals who experienced FI.<sup>6</sup> Increasing poverty due  
67 to weak economic markets and joblessness has also been correlated with higher rates of FI.<sup>7</sup>  
68 Extreme weather events due to climate change has affected food production and availability in  
69 the region, which in turn, has led to increased reliance on food imports.<sup>5</sup> These interrelated

70 factors have wide-ranging consequences, including poor dietary quality, a primary risk factor for  
71 diet-sensitive diseases like hypertension, and the inability of people to manage them properly.<sup>8</sup>  
72 Given the prevalence of FI, evidence of negative health consequences, and paucity of evidence in  
73 the region, we sought to examine the relationship between FI and the hypertension cascade.  
74 Specifically, we aimed to understand the association between FI and prevalence, awareness, and  
75 control of hypertension.

76 **METHODS**

77 **Data source and study sample**

78 We analyzed baseline data from the Eastern Caribbean Health Outcomes Research Network  
79 Cohort Study (ECS) for this study. The ECS is an ongoing longitudinal cohort study conducted  
80 across four Caribbean sites that aims to identify novel risk and protective factors for non-  
81 communicable diseases in the Eastern Caribbean region. The sites included are the U.S. Virgin  
82 Islands, Puerto Rico, Trinidad and Tobago, and Barbados. The cohort was empaneled between  
83 2013 and 2018 across the four sites using varied methods to obtain randomized samples in each  
84 site (n=2,961)<sup>9</sup>. Eligible participants were English or Spanish-speaking community-dwelling  
85 adults 40 years of age and older who had been residents of the island for at least 10 years and  
86 intended to live on the island for the next 5 years. ECS participants were included in the current  
87 study if they had complete blood pressure and food insecurity data at baseline.

88 **Measures**

89 Our main exposure was food insecurity. Food insecurity was measured using the 9-item version  
90 of the Latin American and Caribbean Food Security Scale (ELCSA) previously validated in the  
91 Caribbean.<sup>10</sup> The ELCSA captured household food insecurity within the past 90 days. Response  
92 options were binary (yes/no), and one point was given for each question with a “yes” response.  
93 Responses were summed for each participant and ranged from 0 to 9. Those who scored 0 were  
94 classified as having no food insecurity, 1-6 as having mild/moderate food insecurity, and 7- 9 as  
95 having severe food insecurity. The ninth ELCSA item addresses the social acceptability  
96 dimension of FI and was included as part of ELCSA’s summative score based on psychometric  
97 testing included. Rasch’s modeling of the ELCSA scale in the ECS sample indicated that the full  
98 9-item scale was the best fit<sup>11</sup>. The Cronbach’s Alpha for the scale was 0.90.

99 Our main outcome was hypertension. Hypertension was defined using guidelines established by  
100 the Seventh Report of the Joint National Committee<sup>12</sup> and Caribbean Health Research Council<sup>13</sup>,  
101 which were clinical guidelines used to identify hypertension during the ECS data collection  
102 period. Hypertension was assessed using self-report and clinical assessment data. Details about  
103 the clinical assessment processes have been previously described.<sup>14</sup> Participants were classified  
104 as having hypertension if they had systolic blood pressure  $\geq 140$  mmHg or diastolic blood  
105 pressure  $\geq 90$  mmHg during the clinical exam or answered “yes” to the following question, “Has  
106 a doctor or other health provider EVER told you that you have high blood pressure?” and  
107 reported taking blood pressure lowering medication. Participants who responded “no” to this  
108 question and had blood pressure  $<140$  mmHg and diastolic blood pressure  $< 90$  mmHg were  
109 classified as not having hypertension.

110 Hypertension awareness was assessed as answering “yes” to the question, “Has a doctor or other  
111 health provider EVER told you that you have high blood pressure?” and reported taking blood  
112 pressure lowering medication. Responses of “yes” were categorized as “Aware.” Participants  
113 who responded “no” and had elevated systolic or diastolic blood pressure during the clinical  
114 exam were categorized as “unaware.” Hypertension control was determined among those who  
115 were aware and reported taking medication. Control was assessed using blood pressure values  
116 from the clinical exam and defined as having systolic blood pressure  $<140$  mmHg and diastolic  
117 blood pressure  $<90$  mmHg.

118 Covariates examined included demographic characteristics, healthcare utilization, and site.

119 Demographic characteristics included age, sex, and educational attainment, which were  
120 measured via self-report during the ECS baseline survey. We categorized age into four groups  
121 (40-49, 50-59, 60-69, and 70+). Sex was measured on the baseline survey using the following

122 question, “What sex were you at birth?” Educational attainment was measured using the  
123 question, “What is the highest year of school that you completed?” Responses were categorized  
124 into less than high school (or secondary school), high school graduate, some college, and college  
125 and higher. Usual source of care was used to characterize healthcare utilization and was  
126 measured using the question, “Is there one place you usually go when you need routine or non-  
127 emergent/non-emergency care (for example, regular check-up)?” Responses were categorized  
128 into three categories: none, one, or more.

### 129 **Statistical Analysis**

130 Univariate analyses were conducted to examine the frequency distribution of variables. We  
131 conducted bivariate analyses using chi-square tests to examine the distribution of FI across  
132 demographic and healthcare characteristics. Unadjusted and adjusted logistic regression analyses  
133 were performed to determine associations between FI and hypertension prevalence, awareness,  
134 and control. Adjusted models included age, sex, educational attainment, site, and usual source of  
135 care. These covariates were selected based on evidence from prior literature.<sup>15-17</sup> Sex-stratified  
136 modeling was performed to determine potential differences in the impact of FI for men and  
137 women. Analyses were conducted using SAS statistical software, version 9.4 (Research Triangle  
138 Institute, Research Triangle Park).

### 139 **Ethics Statement**

140 The ECS study was approved by the Yale University Human Subjects Investigation Committee  
141 (protocol 2000026077), the Institutional Review Boards of the University of Puerto Rico  
142 Medical Sciences Campus (protocol 2290033151R001), the University of the Virgin Islands  
143 (protocol 460911-18), and the University of the West Indies Cave Hill Campus (IRB Number:  
144 171102-A), as well as by the Ministry of Health of Trinidad and Tobago. Formal written consent



145 was obtained from study participants. The current analysis was approved by the Data Access and  
146 Scientific Review Committee of the ECS. This study was reported according to STROBE  
147 guidelines.

148

149 **RESULTS**

150 Our final analytic dataset included 2,323 observations after excluding 638 participants who had  
 151 missing FI and blood pressure data (Fig 1). The mean age of participants was 57, 65 percent  
 152 were women, 35 percent had less than a high school education, and most (85%) had one or more  
 153 usual places they received care. The overall prevalence of FI was 28 percent among participants,  
 154 and it was higher in Puerto Rico and Trinidad and Tobago compared to other sites. Among those  
 155 with FI, 17 percent experienced low, 6 percent moderate, and 4 percent experienced severe FI.  
 156 Bivariate analyses showed statistically significant differences in FI by age, sex, educational  
 157 attainment, and site (Table 1). Those living in households with moderate or severe FI were  
 158 younger compared to those who were living in households that were food secure or had low FI.  
 159 Women and those with less than a high school education were more likely to experience low,  
 160 moderate, or severe FI compared to men and those with higher educational attainment (p<0.05).  
 161 Table 2 presents prevalence estimates and logistic regression model results for the relationship  
 162 between FI and hypertension prevalence, awareness, and control. Hypertension prevalence was  
 163 54, 51, and 52 percent among persons with low, moderate, and severe FI, respectively.  
 164 Unadjusted and adjusted model results for FI and hypertension prevalence were not statistically  
 165 significant.

166 **Table 1.** ECS participant characteristics by food security status

| Characteristics        | Total       | Secure          | Low            | Moderate      | Severe        | p-value |
|------------------------|-------------|-----------------|----------------|---------------|---------------|---------|
|                        | 2323        | 1683<br>(72.4%) | 394<br>(17.0%) | 144<br>(6.2%) | 102<br>(4.4%) |         |
| Mean age (SD)          | 57.3 (10.5) | 58.8 (10.6)     | 54.1 (9.5)     | 51.6 (8.0)    | 52.9 (7.4)    | <0.0001 |
| Sex                    |             |                 |                |               |               | 0.0279  |
| Men                    | 817 (35.2)  | 614 (36.5)      | 133 (33.8)     | 35 (24.3)     | 35 (34.3)     |         |
| Women                  | 1506 (64.8) | 1069 (63.5)     | 261 (66.2)     | 109 (75.7)    | 67 (65.7)     |         |
| Educational attainment |             |                 |                |               |               | <.0001  |
| < HS                   | 789 (34.8)  | 541 (32.9)      | 151 (39.7)     | 55 (39)       | 42 (42.0)     |         |

|                            |             |             |            |            |           |        |
|----------------------------|-------------|-------------|------------|------------|-----------|--------|
| HS Grad                    | 540 (23.8)  | 395 (24.0)  | 88 (23.2)  | 32 (22.7)  | 25 (25.0) |        |
| Some College               | 501 (22.1)  | 348 (21.2)  | 88 (23.2)  | 38 (27)    | 27 (27.0) |        |
| College+                   | 436 (19.2)  | 361 (21.9)  | 53 (13.9)  | 16 (11.4)  | 6 (6.0)   |        |
| Site                       |             |             |            |            |           | <.0001 |
| Barbados                   | 703 (30.3)  | 552 (32.8)  | 92 (23.4)  | 36 (25)    | 23 (22.6) |        |
| Puerto Rico                | 735 (31.6)  | 566 (33.6)  | 98 (24.9)  | 41 (28.5)  | 30 (29.4) |        |
| Trinidad and Tobago        | 716 (30.8)  | 452 (26.9)  | 166 (42.1) | 55 (38.2)  | 43 (42.2) |        |
| US Virgin Islands          | 169 (7.3)   | 113 (6.7)   | 38 (9.6)   | 12 (8.3)   | 6 (5.9)   |        |
| Usual source of healthcare |             |             |            |            |           | 0.5157 |
| None                       | 339 (14.7)  | 235 (14.0)  | 61 (15.5)  | 25 (17.4)  | 18 (17.7) |        |
| One or more                | 1974 (85.3) | 1438 (86.0) | 333 (84.5) | 119 (82.6) | 84 (82.4) | ..     |

167 **Table 2.** Association between level of food insecurity and hypertension outcomes

|                                   | Level of Food Insecurity |                  |                  |                  |
|-----------------------------------|--------------------------|------------------|------------------|------------------|
|                                   | Secure (N=1683)          | Low (N=394)      | Moderate (N=144) | Severe (N=102)   |
| Prevalence of Hypertension        | 991/1683 (58.9%)         | 211/394 (53.6%)  | 73/144 (50.7%)   | 53/102 (52%)     |
| Unadjusted OR (95% CI)            | 1.00                     | 0.81 (0.65-1)    | 0.72 (0.51-1.01) | 0.76 (0.51-1.13) |
| Adjusted* OR (95% CI)             | 1.00                     | 1.08 (0.85-1.38) | 1.1 (0.76-1.59)  | 1.01 (0.66-1.54) |
|                                   |                          |                  |                  |                  |
| Lack of Awareness of Hypertension | 346/991 (34.9%)          | 82/211 (38.9%)   | 23/73 (31.5%)    | 19/53 (35.8%)    |
| Unadjusted OR (95% CI)            | 1.00                     | 1.19 (0.87-1.61) | 0.86 (0.52-1.43) | 1.04 (0.59-1.85) |
| Adjusted* OR (95% CI)             | 1.00                     | 0.84 (0.59-1.19) | 0.68 (0.38-1.21) | 0.68 (0.36-1.3)  |
|                                   |                          |                  |                  |                  |
| Lack of Control of Hypertension   | 365/645 (56.6%)          | 73/129 (56.6%)   | 34/50 (68%)      | 25/34 (73.5%)    |
| Unadjusted OR (95% CI)            | 1.00                     | 1 (0.68-1.46)    | 1.63 (0.88-3.01) | 2.13 (0.98-4.63) |
| Adjusted* OR (95% CI)             | 1.00                     | 0.98 (0.65-1.48) | 2.18 (1.13-4.21) | 2.31 (0.99-5.37) |

\* Adjusted for age, sex, education level, site, and usual source of care

168 Results for lack of awareness showed that 35 percent of those who lived in food-secure  
169 households and 39 percent of low food-insecure households were unaware of their hypertension,  
170 compared to 32 percent and 36 percent among those with moderate and severe FI. Unadjusted

171 and adjusted model results showed that lack of hypertension awareness was not significantly  
 172 associated with FI.

173 Results for lack of control showed that 57 percent of households with low FI, 68 percent of those  
 174 with moderate FI, and 73 percent of those with severe FI did not have their hypertension  
 175 controlled, compared to 57 percent among persons who were food secure. Adjusted model  
 176 results for control showed moderate FI was associated with higher odds (OR=2.18; CI=1.13-  
 177 4.21) of poorly controlled hypertension compared to those who were food secure.

178 Table 3 presents sex-stratified model results. Results showed that overall, women who  
 179 experienced moderate or severe FI were more likely to have hypertension and poor control  
 180 compared to men. Fifty-four and 58 percent of women with moderate and severe FI had  
 181 hypertension, compared to 40 percent among men with moderate and severe FI. Similarly, results  
 182 for lack of control showed that women with moderate (72% vs. 43%) and severe FI (81% vs.  
 183 50%) were more likely to lack control of their hypertension compared to men. Unadjusted and  
 184 adjusted model results showed statistically significant positive associations between moderate  
 185 and severe FI and lack of control for women. Results showed that women with moderate and  
 186 severe FI had 2.6- and 3.7 times greater odds of uncontrolled hypertension. Results for men were  
 187 not statistically significant.

188 **Table 3.** Gender-stratified models for food insecurity and hypertension control

|                            | Level of Food Insecurity |                  |                     |                  |
|----------------------------|--------------------------|------------------|---------------------|------------------|
| <b>Women</b>               | Secure<br>(N=1069)       | Low<br>(N=261)   | Moderate<br>(N=109) | Severe<br>(N=67) |
| Prevalence of Hypertension | 625/1069<br>(58.5%)      | 128/261 (49%)    | 59/109<br>(54.1%)   | 39/67 (58.2%)    |
| Unadjusted OR (95% CI)     | 1.00                     | 0.68 (0.52-0.9)  | 0.84 (0.56-1.25)    | 0.99 (0.60-1.63) |
| Adjusted* OR (95% CI)      | 1.00                     | 1.00 (0.73-1.36) | 1.39 (0.89-2.16)    | 1.32 (0.76-2.29) |

|                                                                          |                 |                  |                  |                  |
|--------------------------------------------------------------------------|-----------------|------------------|------------------|------------------|
| Lack of Awareness of Hypertension                                        | 177/625 (28.3%) | 42/128 (32.8%)   | 16/59 (27.1%)    | 13/39 (33.3%)    |
| Unadjusted OR (95% CI)                                                   | 1.00            | 1.24 (0.82-1.86) | 0.94 (0.52-1.72) | 1.27 (0.64-2.52) |
| Adjusted* OR (95% CI)                                                    | 1.00            | 0.93 (0.59-1.47) | 0.83 (0.43-1.57) | 0.84 (0.39-1.8)  |
| Lack of Control of Hypertension                                          | 249/448 (55.6%) | 47/86 (54.7%)    | 31/43 (72.1%)    | 21/26 (80.8%)    |
| Unadjusted OR (95% CI)                                                   | 1.00            | 0.96 (0.61-1.53) | 2.07 (1.03-4.12) | 3.36 (1.24-9.06) |
| Adjusted* OR (95% CI)                                                    | 1.00            | 0.94 (0.57-1.55) | 2.65 (1.25-5.65) | 3.69 (1.2-11.31) |
|                                                                          |                 |                  |                  |                  |
| <b>Men</b>                                                               | Secure (N=614)  | Mild (N=133)     | Moderate (N=35)  | Severe (N=35)    |
| Prevalence of Hypertension                                               | 366/614 (59.6%) | 83/133 (62.4%)   | 14/35 (40%)      | 14/35 (40%)      |
| Unadjusted OR (95% CI)                                                   | 1.00            | 1.13 (0.77-1.66) | 0.45 (0.23-0.91) | 0.45 (0.23-0.91) |
| Adjusted* OR (95% CI)                                                    | 1.00            | 1.38 (0.91-2.09) | 0.58 (0.28-1.18) | 0.58 (0.28-1.18) |
| Lack of Awareness of Hypertension                                        | 169/366 (46.2%) | 40/83 (48.2%)    | 7/14 (50%)       | 6/14 (42.9%)     |
| Unadjusted OR (95% CI)                                                   | 1.00            | 1.08 (0.67-1.75) | 1.17 (0.4-3.39)  | 0.87 (0.3-2.57)  |
| Adjusted* OR (95% CI)                                                    | 1.00            | 0.68 (0.39-1.19) | 0.35 (0.09-1.37) | 0.39 (0.11-1.35) |
| Lack of control                                                          | 116/197 (58.9%) | 26/43 (60.5%)    | 3/7 (42.9%)      | 4/8 (50%)        |
| Unadjusted OR (95% CI)                                                   | 1.00            | 1.07 (0.54-2.1)  | 0.52 (0.11-2.4)  | 0.7 (0.17-2.87)  |
| Adjusted* OR (95% CI)                                                    | 1.00            | 1.12 (0.54-2.32) | 0.69 (0.14-3.36) | 0.86 (0.19-3.86) |
| * Adjusted for age, sex, education level, site, and usual source of care |                 |                  |                  |                  |

189

190

191 **DISCUSSION**

192 This study aimed to determine the relationship between FI and hypertension prevalence,  
193 awareness, and control in the Eastern Caribbean. Our findings showed that FI prevalence was 28  
194 percent and 10 percent of households experienced moderate or severe FI. Findings also showed  
195 sex differences in experiences with FI and the relationship between FI and hypertension control.  
196 Women were more likely to experience food insecurity, and a higher proportion of women with  
197 FI had hypertension compared to men. Findings also showed a statistically significant and  
198 positive association between FI and lack of hypertension control among women. These findings  
199 further substantiate FI as a significant public health issue in the Caribbean and demonstrate its  
200 role in poor blood pressure control. In addition, our findings highlight the differential impact of  
201 FI on health outcomes among women. This study contributes to a growing evidence base on the  
202 health impacts of FI in the Caribbean, where evidence is limited yet needed to guide the creation  
203 of region-specific solutions.

204 Our finding that showed a relationship between FI and poor blood pressure control is novel  
205 within the FI and chronic disease literature. While prior studies have examined associations  
206 between FI and chronic disease management, the preponderance of evidence is focused on  
207 diabetes prevalence and management.<sup>18,19</sup> Fewer studies have examined the association between  
208 FI and hypertension or examined the role of FI in poor blood pressure management, though it has  
209 been linked to poor dietary quality.<sup>20,21</sup> Findings from studies conducted in the US and other  
210 high-income countries show mixed findings for the relationship between FI and hypertension  
211 prevalence, which may be attributed to variation in how blood pressure is measured (self-report  
212 vs. clinical measurement) in studies. Most fail to demonstrate a statistically significant  
213 association. Evidence on the relationship between FI and blood pressure management is scant.

214 Studies that have examined this association suggest a positive association.<sup>20-23</sup> Potential  
215 mechanistic pathways between FI and poor blood pressure include poor dietary quality,  
216 inflammation, and gut microbiome disruptions.<sup>24-26</sup>

217 Findings on sex differences in FI prevalence and the differential impact of FI on blood pressure  
218 control among women are consistent with prior studies. The consistency of these findings spans  
219 context, culture, race, and ethnicity. Several explanations have been offered. Gendered roles and  
220 inequities in earning power and household responsibilities are some explanations for the  
221 observed differences in FI between men and women.<sup>27</sup> In most cases, women are responsible for  
222 food purchasing and preparation. Some evidence suggests that women are more likely to  
223 sacrifice in households experiencing FI by employing strategies like reducing food consumption,  
224 reducing the diversity of foods they consume, and consuming cheaper energy-dense foods to  
225 provide for others in the household.<sup>27</sup> Evidence also suggests women are less likely to absorb  
226 economic and household shocks related to FI due to inequities in access to assets and resources  
227 to cope with FI.<sup>28</sup> Mounting evidence that shows sex differences in the relationship between FI  
228 and obesity<sup>29-31</sup> a risk factor for hypertension, may offer another explanation. Evidence shows a  
229 positive relationship among women<sup>32,33</sup> but not men, which may complicate hypertension  
230 management among women with FI.<sup>34</sup>

231 The current findings are generalizable to populations represented in the ECHORN sites and have  
232 several implications. The high burden of FI across the region and the demonstrated association  
233 with poor blood pressure control suggests an urgent need for policy and healthcare system  
234 interventions. A recent review of nutrition interventions and policies in the small island  
235 developing states, including those in the Caribbean, highlighted the paucity of nutrition policies  
236 in the region and the overall low proportion of states where policies were fully implemented.<sup>35</sup>

237 **Limitations**

238 This study has few limitations. The cross-sectional design of our study precludes the ability to  
239 make inferences about temporality in the relationship between FI and HTN. This may have  
240 contributed to our inability to observe a relationship between FI and HTN prevalence and  
241 awareness. The small sample size available to examine associations between moderate and  
242 severe FI and hypertension outcomes may have precluded the ability to detect statistically  
243 significant differences despite observing strong odds ratios for some model results like lack of  
244 control. Given the age of our cohort and findings that show higher FI among younger persons,  
245 our study may underestimate the overall true burden of FI in the Caribbean region. Despite these  
246 limitations, findings remain salient to efforts to reduce FI and improve blood pressure  
247 management in the region. Future studies will seek to identify food environment and individual  
248 factors that contribute to poor blood pressure management among individuals experiencing FI.

249 **Public Health Implications**

250 Findings have implications for healthcare system solutions to identify and address FI and other  
251 complex social factors that contribute to poor blood pressure control. In addition, an examination  
252 of clinical factors that contribute to a lack of blood pressure control is warranted.



253 **ACKNOWLEDGMENTS**

254 **Disclosure of Which Tasks Each Author Completed**

255 CO, NK, RPE, SH, and JM conceptualized the study. MNS contributed to data acquisition. CO,  
256 RPE, and DG analyzed data. CO, NK, SH, SN, and JM interpreted the results. CO contributed to  
257 drafting and writing. NK, MNS, SH, SN, and JM contributed to the critical review. MNS and  
258 RPE approved the final draft of the paper. All authors read and approved the final manuscript.

259 **Conflicts of Interest**

260 The study sponsor has no role in the study design, collection, analysis, and interpretation of the  
261 data. To the best of our knowledge, there are no relevant conflicts of interest, financial or  
262 otherwise, relevant to this study and the publication thereof to declare.

263 **Data Sharing**

264 The corresponding author had full access to all the data in the study and takes responsibility for  
265 its integrity and the data analysis. Data described in the manuscript will be made available upon  
266 reasonable request.

267

268 **REFERENCES**

- 269 1. UN Report: Global hunger numbers rose to as many as 828 million in 2021.  
270 <https://www.fao.org/newsroom/detail/un-report-global-hunger-SOFI-2022-FAO/en>
- 271 2. World Food Programme. Sharp rise in food insecurity in the Caribbean, survey finds.  
272 Accessed January 20, 2023. [https://www.wfp.org/news/sharp-rise-food-insecurity-caribbean-](https://www.wfp.org/news/sharp-rise-food-insecurity-caribbean-survey-finds)  
273 [survey-finds](https://www.wfp.org/news/sharp-rise-food-insecurity-caribbean-survey-finds)
- 274 3. Programme WF. Caribbean Food Security and Livelihoods Impact Survey. 2023;
- 275 4. Oladele CR, Martinez J, Nunez-Smith M. Abstract P094: Food Insecurity And Elevated  
276 Blood Pressure In The Eastern Caribbean. *Circulation*. 2021;143(Suppl\_1):AP094-AP094.  
277 doi:doi:10.1161/circ.143.suppl\_1.P094
- 278 5. Mohammadi E, Singh SJ, McCordic C, Pittman J. Food Security Challenges and Options  
279 in the Caribbean: Insights from a Scoping Review. *Anthropocene Science*. 2022/03/01  
280 2022;1(1):91-108. doi:10.1007/s44177-021-00008-8
- 281 6. Oladele CR, Colón-Ramos U, Galusha D, et al. Perceptions of the local food environment  
282 and fruit and vegetable intake in the Eastern Caribbean Health Outcomes research Network  
283 (ECHORN) Cohort study. *Prev Med Rep*. Apr 2022;26:101694.  
284 doi:10.1016/j.pmedr.2022.101694
- 285 7. Food Insecurity in the Caribbean continues on upward trajectory, CARICOM-WFP  
286 survey finds. World Food Programme. [https://www.wfp.org/news/food-insecurity-caribbean-](https://www.wfp.org/news/food-insecurity-caribbean-continues-upward-trajectory-caricom-wfp-survey-finds)  
287 [continues-upward-trajectory-caricom-wfp-survey-finds](https://www.wfp.org/news/food-insecurity-caribbean-continues-upward-trajectory-caricom-wfp-survey-finds)
- 288 8. Grilo SA, Shallcross AJ, Ogedegbe G, Odedosu T, Levy N, Lehrer S. Food Insecurity  
289 and Effectiveness of Behavioral Interventions to Reduce Blood Pressure, New York City, 2012-  
290 2013. *Preventing Chronic Disease*. 2015;12:E16. doi:10.5888/pcd12.140368
- 291 9. Thompson T, Maharaj R, Nunez M, Nazario C, Adams O, Nunez-Smith M. Non-  
292 communicable diseases III: the Eastern Caribbean health outcomes research network (ECHORN)  
293 cohort study. *The West Indian medical journal*. 2018;67:40.
- 294 10. Perez-Escamilla R, Dessalines M, Finnigan M, Pachon H, Hromi-Fiedler A, Gupta N.  
295 Household food insecurity is associated with childhood malaria in rural Haiti. *The Journal of*  
296 *nutrition*. Nov 2009;139(11):2132-8. doi:10.3945/jn.109.108852

- 297 11. Martínez-Brockman J, Hromi-Fiedler A, Galusha D, et al. Risk Factors for Household  
298 Food Insecurity in the Eastern Caribbean Health Outcomes Research Network (ECHORN)  
299 Cohort Study. *Frontiers Public Health*. 2023;
- 300 12. Chobanian AV, Bakris GL, Black HR, Cushman WC, Green LA, Izzo JL. The seventh  
301 report of the Joint National Committee on Prevention, detection, evaluation, and treatment of  
302 high blood pressure: the JNC 7 report. *JAMA : the journal of the American Medical Association*.  
303 2003;289doi:10.1001/jama.289.19.2560
- 304 13. council CCMR. Managing Hypertension in Primary Care in the Caribbean. 1998.
- 305 14. Spatz ES, Martínez-Brockman JL, Tessier-Sherman B, et al. Phenotypes of Hypertensive  
306 Ambulatory Blood Pressure Patterns: Design and Rationale of the ECHORN Hypertension  
307 Study. *Ethn Dis*. Fall 2019;29(4):535-544. doi:10.18865/ed.29.4.535
- 308 15. Connelly PJ, Delles C. Journal of Human Hypertension special issue on sex and gender  
309 differences in hypertension. *Journal of Human Hypertension*. 2023/08/01 2023;37(8):587-588.  
310 doi:10.1038/s41371-023-00847-5
- 311 16. Lopez-Lopez JP, Cohen DD, Alarcon-Ariza N, et al. Ethnic Differences in the Prevalence  
312 of Hypertension in Colombia: Association With Education Level. *Am J Hypertens*. Jul 1  
313 2022;35(7):610-618. doi:10.1093/ajh/hpac051
- 314 17. Mills KT, Stefanescu A, He J. The global epidemiology of hypertension. *Nat Rev*  
315 *Nephrol*. Apr 2020;16(4):223-237. doi:10.1038/s41581-019-0244-2
- 316 18. Thomas MK, Lammert LJ, Beverly EA. Food Insecurity and its Impact on Body Weight,  
317 Type 2 Diabetes, Cardiovascular Disease, and Mental Health. *Curr Cardiovasc Risk Rep*.  
318 2021;15(9):15. doi:10.1007/s12170-021-00679-3
- 319 19. Vaccaro JA, Huffman FG. Sex and Race/Ethnic Disparities in Food Security and Chronic  
320 Diseases in U.S. Older Adults. *Gerontol Geriatr Med*. Jan-Dec 2017;3:2333721417718344.  
321 doi:10.1177/2333721417718344
- 322 20. Beltrán S, Pharel M, Montgomery CT, López-Hinojosa IJ, Arenas DJ, DeLisser HM.  
323 Food insecurity and hypertension: A systematic review and meta-analysis. *PLoS One*.  
324 2020;15(11):e0241628. doi:10.1371/journal.pone.0241628
- 325 21. Pérez-Escamilla R, Villalpando S, Shamah-Levy T, Méndez-Gómez Humarán I.  
326 Household food insecurity, diabetes and hypertension among Mexican adults: results from  
327 Ensanut 2012. *Salud Publica Mex*. 2014;56 Suppl 1:s62-70. doi:10.21149/spm.v56s1.5167

- 328 22. Hojaji E, Aghajani M, Zavoshy R, Noroozi M, Jahanihashemi H, Ezzeddin N. Household  
329 food insecurity associations with pregnancy hypertension, diabetes mellitus and infant birth  
330 anthropometric measures: a cross-sectional study of Iranian mothers. *Hypertens Pregnancy*. May  
331 2021;40(2):109-117. doi:10.1080/10641955.2021.1874010
- 332 23. Liu Y, Eicher-Miller HA. Food Insecurity and Cardiovascular Disease Risk. *Curr*  
333 *Atheroscler Rep*. Mar 27 2021;23(6):24. doi:10.1007/s11883-021-00923-6
- 334 24. Li J, Zhao F, Wang Y, et al. Gut microbiota dysbiosis contributes to the development of  
335 hypertension. *Microbiome*. 2017/02/01 2017;5(1):14. doi:10.1186/s40168-016-0222-x
- 336 25. Yan Q, Gu Y, Li X, et al. Alterations of the Gut Microbiome in Hypertension. Original  
337 Research. *Frontiers in Cellular and Infection Microbiology*. 2017-August-24  
338 2017;7doi:10.3389/fcimb.2017.00381
- 339 26. Juul F, Vaidean G, Parekh N. Ultra-processed Foods and Cardiovascular Diseases:  
340 Potential Mechanisms of Action. *Adv Nutr*. Oct 1 2021;12(5):1673-1680.  
341 doi:10.1093/advances/nmab049
- 342 27. Broussard NH. What explains gender differences in food insecurity? *Food Policy*.  
343 2019/02/01/ 2019;83:180-194. doi:<https://doi.org/10.1016/j.foodpol.2019.01.003>
- 344 28. Seligman HK, Laraia BA, Kushel MB. Food insecurity is associated with chronic disease  
345 among low-income NHANES participants. *The Journal of nutrition*. Feb 2010;140(2):304-10.  
346 doi:10.3945/jn.109.112573
- 347 29. Hernandez DC, Reesor L, Murillo R. Gender Disparities in the Food Insecurity-  
348 Overweight and Food Insecurity-Obesity Paradox among Low-Income Older Adults. *J Acad*  
349 *Nutr Diet*. Jul 2017;117(7):1087-1096. doi:10.1016/j.jand.2017.01.014
- 350 30. Hernandez DC, Reesor LM, Murillo R. Food insecurity and adult overweight/obesity:  
351 Gender and race/ethnic disparities. *Appetite*. Oct 1 2017;117:373-378.  
352 doi:10.1016/j.appet.2017.07.010
- 353 31. Koller EC, Egede LE, Garacci E, Williams JS. Gender Differences in the Relationship  
354 Between Food Insecurity and Body Mass Index Among Adults in the USA. *J Gen Intern Med*.  
355 Dec 2022;37(16):4202-4208. doi:10.1007/s11606-022-07714-y
- 356 32. Monroy Torres R, Castillo-Chávez AM, Ruíz-González S. [Food insecurity and its  
357 association with obesity and cardiometabolic risks in Mexican women]. *Nutr Hosp*. Apr 19

358 2021;38(2):388-395. Inseguridad alimentaria y su asociación con la obesidad y los riesgos  
359 cardiometabólicos en mujeres mexicanas. doi:10.20960/nh.03389

360 33. Schlüssel MM, Silva AA, Pérez-Escamilla R, Kac G. Household food insecurity and  
361 excess weight/obesity among Brazilian women and children: a life-course approach. *Cad Saude*  
362 *Publica*. Feb 2013;29(2):219-26. doi:10.1590/s0102-311x2013000200003

363 34. Gooding HC, Walls CE, Richmond TK. Food insecurity and increased BMI in young  
364 adult women. *Obesity (Silver Spring)*. Sep 2012;20(9):1896-901. doi:10.1038/oby.2011.233

365 35. Brown CR, Rocke K, Murphy MM, Hambleton IR. Interventions and policies aimed at  
366 improving nutrition in Small Island Developing States: a rapid review. *Rev Panam Salud*  
367 *Publica*. 2022;46:e33. doi:10.26633/rpssp.2022.33

368

369

370

**Fig 1.** Construction of Study Cohort

**Figure 1: Construction of Study Cohort**

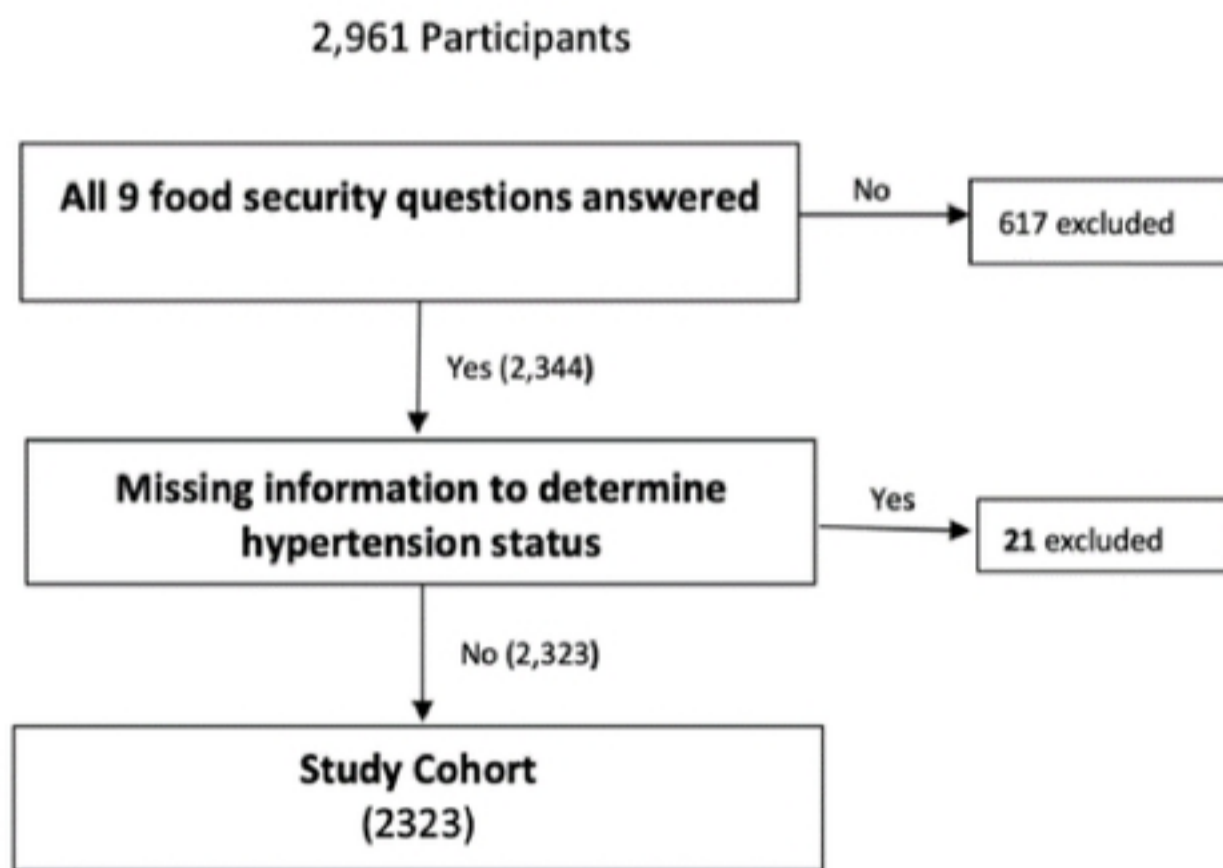

Source: https://www.medrxiv.org/content/10.1101/2024.05.14.24307353v1.full.pdf
